1 **Allelic polymorphism at *foxo* contributes to local adaptation in**  
2 ***Drosophila melanogaster***

3

4

5 Nicolas J. Betancourt<sup>1</sup>, Subhash Rajpurohit<sup>1,2</sup>, Esra Durmaz<sup>3,4</sup>, Daniel K. Fabian<sup>5,6</sup>,  
6 Martin Kapun<sup>3,4</sup>, Thomas Flatt<sup>3,4,\*</sup>, and Paul Schmidt<sup>1,\*</sup>

7

8 <sup>1</sup> Department of Biology, University of Pennsylvania, Philadelphia, USA

9

10 <sup>2</sup> Ahmedabad University, Division of Biological and Life Sciences, Ahmedabad, India

11

12 <sup>3</sup> Department of Ecology and Evolution, University of Lausanne, Lausanne,

13 Switzerland

14

15 <sup>4</sup> Department of Biology, University of Fribourg, Fribourg, Switzerland

16

17 <sup>5</sup> Department of Genetics, University of Cambridge, Cambridge, United Kingdom

18

19 <sup>6</sup> European Bioinformatics Institute (EMBL-EBI), Hinxton, United Kingdom

20

21 \* Co-correspondence:

22 Paul Schmidt, Fax: +1 215 898 8780, E-mail: [schmidtp@sas.upenn.edu](mailto:schmidtp@sas.upenn.edu)

23 Thomas Flatt, Fax: +41 21 692 4165, E-mail: [thomas.flatt@unil.ch](mailto:thomas.flatt@unil.ch)

24

25  
26 **Abstract:** The insulin insulin-like growth factor signaling pathway has been  
27 hypothesized as a major determinant of life history profiles that vary adaptively in  
28 natural populations. In *Drosophila melanogaster*, multiple components of this  
29 pathway vary predictably with latitude; this includes *foxo*, a conserved gene that  
30 regulates insulin signaling and has pleiotropic effects on a variety of fitness-  
31 associated traits. We hypothesized that allelic variation at *foxo* underlies genetic  
32 variance for traits that vary with latitude and reflect local adaptation. To evaluate this,  
33 we generated recombinant outbred populations in which the focal *foxo* allele was  
34 homozygous and fixed for either the allele common at high latitude or low latitude  
35 and the genomic background was randomized across 20 inbred lines. After eight  
36 generations of recombination, experimental populations were phenotyped for a  
37 series of traits related to gene function. Our results demonstrate that natural allelic  
38 variation at *foxo* has major and predictable effects on body size and starvation  
39 tolerance, but not on development time. These patterns mirror those observed in  
40 natural populations collected across the latitudinal gradient in the eastern U.S.:  
41 clines were observed for starvation tolerance and body size, but development time  
42 exhibited no association with latitude. Furthermore, differences in size between *foxo*  
43 genotypes were equivalent to those observed between populations sampled from the  
44 latitudinal extremes, although contribution to the genetic variance for starvation  
45 tolerance was less pronounced. These results suggest that allelic variation at *foxo* is  
46 a major contributor to adaptive patterns of life history variation in natural populations  
47 of this genetic model.

48 **Keywords:** *foxo*, cline, size, starvation tolerance, genetic architecture

49

## 50 **1. INTRODUCTION**

51       Elucidating the molecular, mechanistic basis of adaptive differentiation for  
52 complex traits in natural populations remains a fundamental goal in evolutionary  
53 biology. Outlining the genotype-phenotype map and subsequent investigation into  
54 mechanism requires, to some extent, identification of the genes and variants that  
55 underlie genetic variance realized in the wild. However, fitness traits are often  
56 complex, with a highly polygenic architecture (e.g., Arnegard et al. 2014; McCown et  
57 al. 2014; Savolainen et al. 2013). The likelihood of effectively mapping complex traits  
58 to causative polymorphism varies between two classical viewpoints regarding  
59 architecture for quantitative traits: many loci of small effect vs. few loci of large effect  
60 (Rockman 2012; Wellenreuther and Hansson 2016; Roff 2017; Boyle et al. 2017;  
61 Barton et al. 2017). While these perspectives may be artificially polarized, many  
62 empirical advances in understanding the mechanistic basis of adaptation in sexual,  
63 outbred populations include both a clear identification of traits that drive local  
64 adaptation as well as an apparently simple genetic architecture, with at least one  
65 locus of major effect (e.g., Colosimo et al. 2005; Comeault et al. 2015; van't Hof et  
66 al. 2016; Lamichhaney et al. 2016; Jones et al. 2018). In such examples, alleles  
67 segregating at a locus of major effect can then be examined for functional  
68 differences that affect performance and fitness (e.g., Laurie and Stam 1988;  
69 Manceau et al. 2011; Cheviron et al. 2012; Chakraborty and Fry 2016). What is  
70 unclear, however, is whether alleles at loci underlying local adaptation are typically of  
71 large effect, or whether the effect size of such naturally occurring variants is  
72 effectively negligible for any molecular or functional investigation (e.g., Lewontin  
73 1974; Rockman 2012).

74

75           Body size is a trait commonly associated with fitness (Brown et al. 1993;  
76 Blanckenhorn 2000; Bonnet et al. 2017). In a variety of taxa, size also varies  
77 predictably across environmental gradients such as those associated with latitude  
78 (James et al. 1995; Huey et al. 2000; Ashton 2002; Blanckenhorn and Demont 2004;  
79 Stillwell et al. 2007); such clines suggest that body size is affected by spatially  
80 varying selection and contributes to local adaptation (Partridge and Coyne 1997;  
81 Stillwell 2010). While size-related traits are in general highly polygenic (e.g., Boyle et  
82 al. 2017), major effect loci have also been observed (e.g., Sutter et al. 2007). In  
83 particular, multiple components of the insulin insulin-like growth factor signaling  
84 pathway (IIS) can regulate size (e.g., Colombani et al. 2005; Sutter et al. 2007); in  
85 particular, the forkhead box-O transcription factor gene *foxo* is a major regulator of  
86 IIS and impacts size as well as a variety of other traits associated with fitness  
87 (Libina, Berman, & Kenyon, 2003; Kramer, Davidge, Lockyer, & Staveley, 2003;  
88 Kramer, Slade, & Staveley, 2008; Hwangbo, Gersham, Tu, Palmer, & Tatar, 2004;  
89 Fielenbach & Antebi, 2008; Mattila, Bremer, Ahonen, Kostianen, & Puig, 2009).  
90 Thus, the analysis of variation in body size offers an excellent system in which to  
91 examine aspects of genetic architecture and the integration between allelic and  
92 phenotypic patterns in natural populations.

93

94           In *Drosophila melanogaster*, body size increases with increasing latitude on  
95 multiple continents (Coyne and Beecham 1987; James et al. 1995, 1997; Karan et  
96 al. 1998). Such latitudinal patterns are mirrored by altitudinal clines where size  
97 increases with increasing altitude (Fabian et al. 2015; Lack et al. 2016). These  
98 parallel and replicated patterns suggest that patterns of size variation are adaptive

99 and directly associated with thermally mediated selection (reviewed in Stillwell 2010).  
100 However, it remains unknown why small body size is associated with high fitness at  
101 low latitudes and large size with high fitness at high latitudes. De Jong and  
102 Bochdonavits (2003) hypothesized that adaptive patterns of size variation are driven  
103 primarily by one or more components of the IIS pathway; the simple prediction is that  
104 any causative variants would also exhibit pronounced and replicated allele frequency  
105 clines. Analysis of PoolSeq data has shown that multiple IIS genes (e.g., *Pi3K*, *foxo*,  
106 *InR*) are segregating for many alleles that vary predictably with latitude in *D.*  
107 *melanogaster* (Kolaczowski et al. 2011; Fabian et al. 2012; Bergland et al. 2014;  
108 Kapun et al. 2016; Machado et al. 2018). The question is whether these clinal alleles  
109 are distinct with respect to gene function and, at least in part, underlie the observed  
110 patterns of local adaptation in size (Paaby et al. 2014).

111

112 Here, we examine the functional significance of naturally occurring allelic  
113 variation at the forkhead box-O transcription factor gene *foxo* and evaluate whether  
114 the effects of allelic variation are consistent with patterns of variation among natural  
115 populations. We use a specific *foxo* allele, previously identified in PoolSeq data as  
116 being strongly clinal in the eastern U.S. (Fabian et al. 2012), as a marker for  
117 candidate alleles of functional significance. If size in *D. melanogaster* is highly  
118 polygenic with no loci of major effect, then alleles segregating at *foxo* should be  
119 effectively and functionally equivalent in laboratory- or field-based functional assays.  
120 However, if *foxo* is a major locus for body size in this species, then effect size may  
121 be of sufficient magnitude to be detectable. If allelic variation at *foxo* substantially  
122 contributes to phenotypic variation and local adaptation, then the effects of *foxo*  
123 alleles on phenotype should also be concordant with patterns observed in natural

124 populations. Such patterns should also be trait-specific and restricted to those  
125 related to gene function.

126

127

## 128 **2. MATERIAL AND METHODS**

### 129 **2.1 Identification of SNPs/alleles that vary predictably with latitude**

130 Fabian et al. (2012) identified a series of SNPs in *foxo* that exhibited high  $F_{ST}$   
131 in pooled sequencing of natural populations derived from Florida (low latitude),  
132 Pennsylvania (mid latitude), and Maine, U.S.A. (high latitude). From this analysis, we  
133 identified a candidate *foxo* allele based on the nucleotide state at two SNPs  
134 spanning approximately 2kb. Further details are provided in Durmaz et al. (2018).

135 To further examine clinal patterns associated with the focal low- and high-  
136 latitude *foxo* haplotypes, we analyzed ten populations collected along the latitudinal  
137 gradient of the U.S. east coast and sequenced as pools (Bergland et al. 2014; Kapun  
138 et al. 2016; Machado et al. 2018). We restricted our analyses to high-confidence  
139 SNPs that were polymorphic in the *Drosophila* Genetic Reference Panel (DGRP)  
140 dataset (Mackay et al. 2012; Langley et al. 2012) and isolated a total of 1372 SNPs  
141 located inside or within 2kbp up- and downstream of the annotated *foxo* gene. To  
142 provide a null context for allele frequency differentiation, we isolated 20,000 SNPs  
143 located in short introns (<60bp) and at least 100 kbp distance from the breakpoints  
144 of common cosmopolitan inversions (Corbett-Detig et al. 2012) that are consistent  
145 with patterns of evolutionary neutrality (Parsch et al. 2010; Clemente & Vogl 2012).  
146 For each of these neutral and *foxo*-associated SNPs, we tested for significant  
147 correlations between latitude and allele frequencies using generalized linear models  
148 (GLM) with a binomial error structure of the form:  $y_i = L + \varepsilon_i$ , where  $y_i$  is the allele

149 frequency of the  $i^{\text{th}}$  SNP,  $L$  is the continuous factor “Latitude” and  $\varepsilon_i$  is the binomial  
150 error of the  $i^{\text{th}}$  SNP. We further assessed whether allele frequency changes of the  
151 two candidate SNPs that constitute our focal haplotype were more clinal than neutral  
152 SNPs or other SNPs located within or in the proximity of *foxo*. To this end, we  
153 compared the  $-\log_{10}(p)$ -values from the GLMs for each of the two focal SNPs to  
154 distributions of  $-\log_{10}(p)$ -values from GLMs of either neutral SNPs or non-candidate  
155 SNPs associated with *foxo*. We subsequently calculated empirical cumulative  
156 distribution functions (ECDF; with total area =1) based on  $-\log_{10}(p)$ -values from all  
157 neutral or non-candidate *foxo* SNPs in *R* (R Development Core Team 2009). To test  
158 if the significance values associated with the two focal SNPs were greater than the  
159 95 percentiles of each significance distribution, we integrated over the area under  
160 each ECDF with values larger than the significance of each candidate SNP (see gray  
161 areas limited by red dashed lines in Figure 1) and subtracted the integral value from  
162 1, which represents the total area of the ECDF.

163 To investigate and visualize the relative patterns of allele frequency change  
164 for the two focal SNPs with respect to all other SNPs located inside or in close  
165 proximity to *foxo*, we conditioned the alleles with lower frequencies in Florida  
166 compared to the population in Maine for each *foxo*-associated SNP. Allele  
167 frequencies in Florida were set to zero and we then calculated the allele frequency  
168 differences relative to Florida for all other populations.

169

## 170 **2.2 Constructing recombinant population cages**

171 Based on the combination of the results of Fabian et al. (2012) and the  
172 DrosRTEC (*Drosophila* Real-Time Evolution Consortium) sequencing effort  
173 (Machado et al. 2018), we identified individual lines in the DGRP (Mackay et. al

174 2012) that were homozygous for the candidate *foxo* allele that was at high frequency  
175 in high-latitude populations (hereafter, the high-latitude allele), and lines that were  
176 fixed for the *foxo* allele that was at high frequency in low-latitude samples (hereafter,  
177 the low-latitude allele). Scripts for this filtering of the DGRP based on nucleotide  
178 state and locus are provided in the raw data (Data Dryad submission XXXXX). Two  
179 biological replicate population cages, denoted as sets A and B, were established  
180 using 20 independent lines per cage per *foxo* allele; thus, each cage was  
181 constructed with a completely distinct and independent set of inbred lines. Each  
182 population cage was founded using 10 individuals of each sex, from age- and  
183 density-controlled cohorts, from each of the 20 inbred DGRP founding lines.

184 Biological replicates were further split into two experimental replicates in the  
185 first generation of founding and cultured independently thereafter. After  
186 establishment, each population cage was cultured at a population size of ~2000  
187 adults on standard cornmeal-molasses medium for 8 discrete generations of  
188 outcrossing under conditions of constant temperature (25°C) and photoperiod  
189 (12L:12D) in Percival I36VL incubators. Thus, at the end of the experimental period,  
190 we generated replicate population cages in which the focal *foxo* allele was  
191 homozygous and fixed for either the high-latitude or low-latitude allele and the  
192 genomic background was randomized across the 20 inbred lines used to found each  
193 respective cage (Paaby et al. 2014; Behrman et al. 2018). To further test for  
194 genome-wide patterns of genetic differentiation among the recombinant outbred  
195 populations (ROP) fixed for either the high or low-latitude haplotypes, we calculated  
196 SNP-wise  $F_{ST}$  based on the method of Weir and Cockerham (1984) for sets A and B  
197 separately using custom software. After the eight generations of density-  
198 standardized culture under standardized environmental conditions, we established



199 replicate density-controlled vial cultures ( $30 \pm 10$  eggs/vial) for subsequent  
200 phenotyping of the high-latitude and low-latitude *foxo* alleles.

201

### 202 **2.3 Isofemale lines from natural populations**

203 Thirty isofemale lines were randomly selected from each of six previously  
204 collected outbred populations along the east coast of the U.S. to serve as a  
205 latitudinal comparison to the recombinant *foxo* populations (described in Rajpurohit  
206 et al. 2017, 2018: Homestead, FL (HFL), Jacksonville, FL (JFL), Charlottesville, VA  
207 (CVA), Media, PA (MPA), Lancaster, MA (LMA), and Bowdoin, ME (BME)). The  
208 individual lines from each population were maintained on a standard 21d culture  
209 regime under the same environmental conditions as the *foxo* recombinant cages.  
210 Prior to phenotyping, each isofemale line was cultured for two generations at low  
211 density ( $30 \pm 10$  eggs/vial) at 25°C, 12L:12D; in the third generation, freshly eclosed  
212 flies were collected in daily cohorts and used in the phenotypic assays described  
213 below.

214

### 215 **2.4 Phenotype assays**

216 In all assays, *foxo* recombinant cages were tested simultaneously at three  
217 independent timepoints and the data partitioned into blocks. For assessment of  
218 starvation resistance, virus infection of the cages precluded running three  
219 independent blocks, and a single timepoint was included in the analysis. For the  
220 natural populations, all lines from all populations were assayed simultaneously for all  
221 phenotypes using discrete 1d cohorts for each phenotype.

222 *Starvation resistance.* For the *foxo* recombinant outbred populations, embryos  
223 were collected from each cage in two replicate glass culture bottles and density was

224 standardized at  $150 \pm 10$  eggs per bottle. Isofemale lines from the natural populations  
225 were transferred into replicate vials and density standardized at  $30 \pm 10$  embryos per  
226 vial. All culture was done under standard conditions of  $25^{\circ}\text{C}$  and a photoperiod of  
227 12L:12D. Upon eclosion, mixed sex daily cohorts were collected over 3d and  
228 subsequently aged to 5d. The flies were then separated by sex into replicate groups  
229 of 10 and placed into glass vials equipped with a small cotton ball saturated with 1  
230 mL of water. Samples were placed in an incubator at  $25^{\circ}\text{C}$ , 12L:12D and mortality  
231 was recorded at four timepoints per day (9AM, 1PM, 5PM, and 9PM) until all flies  
232 had died. The *foxo* cages were assayed in three replicates per cage population; all  
233 isofemale lines from each of the natural populations were also assayed.

234 *Development time.* For the *foxo* recombinant outbred populations, eggs were  
235 collected from each cage over a 3h window using large Petri dishes containing  
236 standard medium supplemented with live yeast. The collected eggs were then  
237 counted and distributed in groups of 30 into three replicate vials per cage. For the  
238 natural populations, embryos from all isofemale lines were similarly collected over 3h  
239 in small collection receptacles. Embryos were counted and distributed to new  
240 collection vials, with density also standardized at 30 embryos per vial. All  
241 experimental material was subsequently cultured as previously described in Percival  
242 I36VL incubators with constant and standardized humidity, temperature, and  
243 photoperiod. All experimental vials were checked four times daily (9AM, 1PM, 5PM,  
244 9PM); eclosion events and sex were recorded.

245 *Body size/morphology.* For both the *foxo* cage as well as the natural  
246 populations, flies from the development assay were transferred to new vials, allowed  
247 to mate and age for 5d post eclosion, then were preserved in 95% ethanol in  
248 eppendorf tubes for subsequent size measurements. From these preserved

249 samples, 10 flies for each sex were randomly sampled and measured from each  
250 *foxo* ROP cage and 5 flies for each sex were measured for each isofemale line from  
251 the natural populations. Body size measurements (thorax length and wing area)  
252 were recorded using a Leica MZ9.5 microscope mounted with an Olympus DP73  
253 camera with CellSens standard measuring software. Thorax length was measured  
254 as the longest length across the dorsal shield; wing area was defined as a polygon  
255 using a standardized series of veinous landmarks. The ratio of total wing area to  
256 thorax length, indicative of wing loading (Azevedo et al. 1998; Gilchrist et al. 2000),  
257 was also calculated and subsequently analyzed.

258

## 259 **2.5 Statistical analysis**

260 For the natural populations, data were analyzed separately by sex. Isofemale  
261 line was considered a random variable and all data were analyzed using a restricted  
262 maximum likelihood ANOVA with population as a fixed effect. For all other traits  
263 other than starvation tolerance, experimental block (N=3) was also included as a  
264 covariate. For the *foxo* experimental population cages, a similar nested ANOVA was  
265 run independently for both sexes in which *foxo* allele, biological replicate (set), and  
266 experimental replicate (cage) were included as predictors.

267

## 268 **3. RESULTS**

### 269 **3.1 DrosRTEC Pooled Population Genome Sequencing**

270 By analyzing extensive genome-wide Pool-Seq data from ten populations  
271 sampled along the U.S. east coast generated by the DrosRTEC consortium  
272 (Bergland et al. 2014; Kapun et al. 2016; Machado et al. 2018), we show that  
273 numerous SNPs associated with *foxo* exhibit steep latitudinal clines and extensive

274 differentiation as a function of geography (Figure 1). Notably and consistent with  
275 previous observations by Fabian et al. (2012), the two focal *foxo* candidate SNPs  
276 that are highlighted by black and red lines in Figures 1A and 1B, respectively, exhibit  
277 strong allele frequency change between the populations at lowest and highest  
278 latitudes. In fact, clinal patterns of the two candidate SNPs were more pronounced  
279 than 95% of neutrally evolving SNPs located in short introns (>95.94% for  
280 3R:9,892,517 and >98% for 3R:9,894,559, respectively; Figure 2 A, B) and 91% of  
281 all non-candidate SNPs located within or close to *foxo* (>91.22% for 3R:9,892,517  
282 and >96% for 3R:9,894,559, respectively; Figure 2 C, D).

283         In establishing the recombinant outbred populations (ROPs) using the DGRP  
284 panel of inbred lines, the goal was to use candidate SNPs as markers of functional  
285 effects for naturally occurring alleles or haplotypes at this locus (Paaby et al. 2014;  
286 Berhman et al. 2018). The utility of this method is predicated on using a sufficient  
287 number of independent inbred lines such that no other position in the genome, other  
288 than the candidate site(s), is fixed or highly differentiated between experimental sets.  
289 In Figure 3,  $F_{ST}$  between experimental cages (*foxo* allele AT vs. *foxo* allele GG) is  
290 plotted as a function of chromosomal position for all SNPs segregating in the  
291 biological replicate sets A (Figure 3A) and B (Figure 3B). While there are multiple  
292 sites on each chromosome arm with  $F_{ST} > 0.4$  between the sets of lines used to  
293 construct the alternative *foxo* allelic cages, only the candidate sites are fixed  
294 between the cages that comprise the allelic states.

295

### 296 **3.2 Clinal variation in natural populations**

297         *Body size.* In the six sampled natural populations, thorax length was highly  
298 distinct among populations (Table 1), and these patterns of differentiation exhibited a

299 positive association with latitude (Figure 4C). Wing area exhibited qualitatively  
300 identical patterns, as did the ratio of wing area to thorax length (Table 1, Figure 4D).  
301 Sexes were analyzed separately due to dimorphism and the potential for differential  
302 allometry, but exhibited highly similar patterns of size variation among populations  
303 and as a function of latitude. As expected, these results are consistent with previous  
304 associations between latitude and body size in *D. melanogaster* (Coyne and  
305 Beecham 1987; James et al. 1995; de Jong and Bochdanovits 2003).

306

307 *Starvation resistance.* As with body size, starvation tolerance was highly  
308 variable among isofemale lines within populations yet exhibited a robust association  
309 with geography for both sexes (Table 1, Figure 3A). The increase in starvation  
310 tolerance as a function of increasing latitude appears more pronounced for females  
311 than males, although patterns are qualitatively identical and no heterogeneity of  
312 slopes was detected (analysis not shown). The patterns of increasing tolerance with  
313 increasing latitude is consistent with other aspects of stress tolerance in North  
314 American populations (Schmidt and Paaby 2008), but opposite to what has been  
315 observed on the Indian subcontinent (e.g., Karan et al. 1998). Starvation tolerance  
316 does not appear to vary predictably with latitude in other assayed geographic regions  
317 (Robinson et al. 2000; Hoffmann et al. 2001).

318

319 *Development time.* In contrast to the patterns observed for size and starvation  
320 tolerance, development time did not vary predictably with latitude. For both males  
321 and females, significant variation was observed among lines and among populations  
322 but there was no association with latitudinal origin (Table 1, Figure 4B). We did,  
323 however, observe distinct patterns of development time among the replicate

324 experimental blocks, despite controlling for density and culture conditions. This  
325 suggests that the trait is affected by additional environmental variables,  
326 measurement or other experimental error, or a combination of the two. It should be  
327 noted, however, that in examination of the experimental blocks individually, no  
328 significant association between development time and latitudinal origin of the  
329 population was observed. This is in contrast to patterns of seasonal variation, which  
330 demonstrate predictable change in development time as a function of time of  
331 collection (Behrman et al. 2015). All raw data for the phenotyping of these natural  
332 collections are available (Dryad Accession: XXXXXXXX).

333

### 334 **3.3 Phenotypic differentiation between *foxo* alleles**

335 *Body size.* Thorax length and wing area were both highly distinct between the  
336 high and low-latitude *foxo* genotypes (Table 2). Significant heterogeneity was  
337 present between the replicate sets A and B, as expected based on distinct  
338 composition of founding inbred lines, as well as among experimental replicates that  
339 were cultured independently since cage initiation. Despite these two sources of cage  
340 effects, the differences between *foxo* genotypes were consistent with expectations  
341 based on geography: the genotypes homozygous for the high-latitude *foxo* allele  
342 were significantly larger than genotypes homozygous for the low-latitude allele  
343 (Figure 4). The ratio of wing area to thorax length did not show any further  
344 differentiation between genotypes, but as with the two traits independently,  
345 demonstrated significant and predictable differences between the high and low-  
346 latitude *foxo* genotypes (Figure 4H). Furthermore, the observed differences between  
347 *foxo* genotypes are strikingly similar in effect size to the trait differences observed

348 between the populations sampled from the latitudinal extremes (Figure 4 C,D vs.  
349 Figure 4 G,H).

350

351 *Starvation resistance.* Similar to the observed differences in various metrics  
352 for body size, starvation resistance was also distinct between the *foxo* genotypes  
353 and varied predictably with geography (Table 2, Figure 4). For both males and  
354 females, the genotype homozygous for the high-latitude *foxo* allele was associated  
355 with increased starvation tolerance, which may be associated with effects of the  
356 alleles on body size and lipid content (e.g., Chippindale et al. 1996). A significant  
357 amount of variance in starvation tolerance was also associated with cage effects for  
358 both sets of inbred lines and culture replicate (Table 2). The effect size associated  
359 with *foxo* genotype was approximately 10%, again similar to what was observed for  
360 associated differences in body size. However, unlike the patterns observed for size  
361 related traits, the differences between *foxo* genotypes appear to explain a small  
362 amount of the variance in this trait among natural populations across the sampled  
363 geographic range in the eastern U.S. (Figure 4A, H). These distinct patterns suggest  
364 that differences in starvation tolerance are not determined exclusively by differences  
365 in size.

366

367 *Development time.* Development time varied significantly across sets of lines  
368 and replicates; in contrast to the other traits measured, development time was not  
369 distinct between the high- and low-latitude *foxo* alleles (Table 2, Figure 4). Overall  
370 these results suggest that there is no functional significance associated with these  
371 naturally occurring *foxo* alleles with respect to development time. This is somewhat  
372 congruent with data on Australian clines, where the relationship between body size

373 and development time is inconsistent across latitude (e.g., James et al 1995, 1997).  
374 Development time was the most variable of the traits studied here, both with respect  
375 to experimental replication and variation among natural as well as reconstituted  
376 outbred populations.

377

## 378 **4. DISCUSSION**

379 In *D. melanogaster*, there is abundant evidence for local adaptation. Natural  
380 populations exhibit rapid and predictable responses to environmental parameters  
381 that vary with season, both in terms of phenotypic (Schmidt and Conde 2006;  
382 Behrman et al. 2015; Rajpurohit et al. 2017; Behrman et al. 2018a; Behrman et al.  
383 2018b; Rajpurohit et al. 2018) and allele frequency (Cogni et al. 2014; Bergland et al.  
384 2014; Behrman et al. 2018a; Machado et al. 2018) change. Similarly, many fitness-  
385 associated traits have been shown to vary predictably with latitude, often in parallel  
386 across independent gradients (e.g., Oakeshott et al. 1982; Paaby et al. 2010; Yang  
387 and Edery 2018). Latitudinal allele frequency clines at candidate loci (e.g., Schmidt  
388 et al. 2000; Betancourt et al. 2001; Sezgin et al. 2005; Paaby et al. 2010; Coggi et al.  
389 2017) are now placed in a genomic context in which tens of thousands of SNPs are  
390 known to be clinal (e.g., Kolackowski et al. 2011; Fabian et al. 2012; Bergland et al.  
391 2016; Kapun et al. 2016). While it is clear that some allele frequency clines may be  
392 generated by demography (Kao et al. 2015; Bergland et al. 2016), it is also clear that  
393 at least some of the observed clines may be generated by spatially varying selection  
394 (Schmidt et al. 2008; Svetec et al. 2016). Two of the associated, major questions  
395 are: 1) how many, or what proportion of, allele frequency clines reflect spatially  
396 varying selection and thus local adaptation; and 2) how are allele frequency and  
397 phenotypic clines integrated? Alleles exist in a genomic context, and complex traits



398 are similarly correlated as well as affected by epistasis (Mackay 2014); it is  
399 extremely unlikely that all allele and phenotypic clines are independent and reflect  
400 selection on single variants or traits. However, the effect size of individual “adaptive  
401 polymorphisms” and the architecture of local adaptation are, arguably, not well  
402 resolved. There is a paucity of detailed, mechanistic and comprehensive  
403 investigations as to the functional significance of segregating polymorphisms in  
404 natural populations. It is clearly infeasible, as well as misguided, to assess the  
405 functional impact of all polymorphisms across the genome. However, we suggest  
406 that multiple, intersecting methodologies (e.g., direct mapping, expression analyses,  
407 mutant analysis, patterns of variation in natural populations) can be used to identify a  
408 subset of variants that may be examined for functional significance. Ideally,  
409 investigation of a sufficient number of outliers could generate an empirical  
410 distribution of genic or allelic effect sizes for specific fitness-associated traits. Such  
411 investigations are essential in resolving the genetic architecture and dynamics of  
412 local adaptation.

413         The *foxo* alleles we examine here are an example of a robust candidate  
414 suitable for functional analysis. Genetic manipulations of the *foxo* gene have  
415 revealed pronounced effects on lifespan, multiple aspects of stress tolerance  
416 including starvation resistance, and growth phenotype (Jünger et al., 2003; Puig,  
417 Marr, Ruhf, & Tjian, 2003; Kramer, Davidge, Lockyer, & Staveley, 2003; Hwangbo,  
418 Gersham, Tu, Palmer, & Tatar, 2004; Giannakou et al. 2004; Kramer, Slade,  
419 Staveley, 2008; Slack, Giannakou, Foley, Goss, & Partridge, 2011). These traits vary  
420 with latitude in *D. melanogaster* (Coyne & Beecham 1987; James et al. 1995;  
421 Schmidt et al. 2005); thus, the *foxo* gene is a logical candidate for determining  
422 variation for these traits in natural populations (de Jong and Bochdonavits 2003).

423 However, the effects of natural variation have not been previously addressed. While  
424 loss of function mutants are highly pleiotropic and have pronounced effects on life  
425 history phenotypes, and the IIS/TOR pathway is in general extremely pleiotropic,  
426 polymorphisms segregating in natural populations need not affect variance for all  
427 traits related to gene function (e.g., Stern 2011).

428 Our results demonstrate that allelic variation at *foxo* affects body size and  
429 starvation tolerance. We further show that these measures of size, thorax length and  
430 wing area, as well as starvation tolerance, vary predictably with latitude in natural  
431 populations of *D. melanogaster*. Furthermore, the high-latitude *foxo* allele is  
432 associated with larger size and greater starvation resistance, whereas flies  
433 homozygous for the low-latitude *foxo* allele are smaller and less tolerant. Thus, the  
434 allelic effects also parallel patterns of variation in natural populations. This is distinct  
435 from the countergradient patterns that have been previously observed for allelic  
436 variants at the *Drosophila insulin receptor (InR)* (Paaby et al. 2014). The effect size  
437 of the *foxo* alleles is seemingly large, particularly for body size: the difference  
438 between high and low-latitude *foxo* alleles is approximately the same as the  
439 observed size difference between flies sampled from Florida and Maine. This  
440 suggests that allelic variation at *foxo* is a major contributor to variance in body size in  
441 these populations. It remains to be determined whether *foxo* is a major effect locus  
442 for size in other taxa.

443 Durmaz et al. (2018) demonstrate that these focal *foxo* variants also have  
444 significant effects on viability, fat catabolism, and FOXO activity, as indicated by  
445 differences in transcript abundance of a FOXO target (*InR*). These investigations  
446 were done after an additional four generations of recombination, and parallel  
447 differences across studies were observed for different measures of body size: wing

448 area, thorax length, the ratio of wing area:length, and femur length were all greater in  
449 the populations homozygous for the high-latitude allele than in the recombinant  
450 populations homozygous for the low-latitude allele. Differences between the high and  
451 low-latitude *foxo* variants were largely consistent across two assayed temperatures  
452 and two diets, although genotype by environment interactions were observed for  
453 both starvation tolerance and lipid metabolism (Durmaz et al. 2018). While our  
454 results for *foxo* allelic effects are consistent with those of Durmaz et al. (2018) for  
455 measures of size, patterns of starvation tolerance for the high and low-latitude alleles  
456 are opposite: in our data, populations with the high-latitude *foxo* allele were more  
457 starvation tolerant, whereas in Durmaz et al. (2018) the low-latitude allele was  
458 associated with increased tolerance. The discrepancy may be due to methodological  
459 disparity, as the two assays are distinct; our method is associated with faster  
460 mortality and may involve a greater degree of desiccation stress than the agar  
461 method. Desiccation tolerance does vary with latitude in North American populations  
462 (Rajpurohit et al. 2018), although the effects of *foxo* on desiccation tolerance are  
463 unknown. Alternatively, the one observed difference across the two studies may be  
464 associated with laboratory-specific microbiota, which is known to vary across labs  
465 and culture conditions (Staubach et al. 2012) and has pronounced effects on *D.*  
466 *melanogaster* life histories (Walters et al., in review).

467         Despite the parallels we observed between the assayed *foxo* variants and the  
468 patterns in natural populations, we cannot conclude that it is these two focal SNPs  
469 (positions) that themselves cause the observed differences in starvation tolerance  
470 and size, or directly contribute to variance for these traits in natural populations. The  
471 linkage disequilibrium present in the founding inbred lines (DGRP) would decay to  
472 some extent by the eight generations of outcrossing among founder lines, but

473 remains pronounced; thus, without further characterization these SNPs are  
474 interpreted as markers for the functionally significant allelic variation segregating at  
475 this locus. Gene editing or similar techniques, in which the focal sites are  
476 manipulated in multiple common genetic backgrounds, would be essential in directly  
477 examining causality. Such investigations are the focus of future work.

478

## 479 **5. CONCLUSION**

480 We find that the marker allele at *foxo* has predictable effects on body size and  
481 starvation tolerance; no effects of *foxo* alleles on development time were observed.

482 We also show that both starvation tolerance and body size exhibit pronounced  
483 latitudinal clines in six sampled natural populations, whereas development time  
484 exhibited no association with latitude. The assayed alleles at *foxo* explain a small  
485 amount of the variance among natural populations for starvation tolerance, but  
486 appear to be a major factor in the determination of variance in size. Our results  
487 suggest a distinct genetic architecture for correlated fitness traits, and that allelic  
488 variation at the *foxo* locus underlies, in part, patterns of local adaptation in natural  
489 populations of this genetic model.

490

## 491 **ACKNOWLEDGEMENTS**

492 We thank members of the Flatt and Schmidt labs for their gracious assistance in all  
493 aspects of this work. Financial support was provided by the National Institutes of  
494 Health (R01GM100366 to P.S.), the U.S. National Science Foundation  
495 (DEB0921307 to P.S.), the Austrian Science Foundation (FWF P21498-B11 to T.F.),  
496 and the Swiss National Science Foundation (PP00P3\_133641 to T.F.).

497

498 **DATA ACCESSIBILITY**

499 The raw phenotypic data are available from Dryad at: XXXXX.

500

501 **AUTHOR CONTRIBUTIONS**

502 P.S. and T.F. conceived the project. D.F. and M.K. identified the *foxo* SNPs and

503 performed genomic analyses. P.S., S.R., E.D. and T.F. designed the experiments.

504 N.B. and S.R. established populations and performed the experiments. P.S., N.B.,

505 E.D., M.K., S.R. and T.F. analyzed the data. N.B., T.F. and P.S. wrote the paper with

506 input from the other authors.

507

508 **ORCID**

509 *Nicolas Betancourt* <https://orcid.org/0000-0002-8768-9829>

510 *Paul Schmidt* <https://orcid.org/0000-0002-8076-6705>

511 *Subhash Rajpurohit* <https://orcid.org/0000-0001-9149-391X>

512 *Thomas Flatt* <https://orcid.org/0000-0002-5990-1503>

513 *Esra Durmaz* <https://orcid.org/0000-0002-4345-2264>

514 *Martin Kapun* <https://orcid.org/0000-0002-3810-0504>

515

516 **COMPETING INTERESTS**

517 The authors of this manuscript have declared no competing interests.

518

519

520

521

522

523 **LITERATURE CITED**

524

- 525 Arnegard, M. E., McGee, M. D., Matthews, B., Marchinko, K. B., Conte, G. L., Kabir,  
526 S., ... Schluter, D. (2014). Genetics of ecological divergence during  
527 speciation. *Nature*, 511(7509), 307–311. <http://doi.org/10.1038/nature13301>  
528 Ashton KG. (2002). Patterns of within-species body size variation of birds: strong  
529 evidence for Bergmann's rule. *Global Ecol. Biogeogr.* 11:505–523.  
530 Azevedo, R.B.R., James, A.C., McCabe, J., & Partridge, L. (1998). Latitudinal  
531 variation of wing: thorax size ratio and wing aspect ratio in *Drosophila*  
532 *melanogaster*. *Evolution*, 52, 1353-1362. [https://doi.org/10.1111/j.1558-](https://doi.org/10.1111/j.1558-5646.1998.tb02017.x)  
533 [5646.1998.tb02017.x](https://doi.org/10.1111/j.1558-5646.1998.tb02017.x).  
534 Barton N.H., A.M. Etheridge, A. Veber. (2017). The infinitesimal model: Definition,  
535 derivation, and implications. *Theoretical Population Biology* 118 (2017) 50–73.  
536 BEHRMAN, E. L., WATSON, S. S., O'BRIEN, K. R., HESCHEL, M. S., & SCHMIDT,  
537 P. S. (2015). Seasonal variation in life history traits in  
538 two *Drosophila* species. *Journal of Evolutionary Biology*, 28(9), 1691–1704.  
539 <http://doi.org/10.1111/jeb.12690>  
540 Behrman, E. L., Howick, V. M., Kapun, M., Staubach, F., Bergland, A. O., Petrov, D.  
541 A., ... Schmidt, P. S. (2018). Rapid seasonal evolution in innate immunity of wild  
542 *Drosophila melanogaster*. *Proceedings of the Royal Society of London B*, 285,  
543 20172599. <https://doi.org/10.1098/rspb.2017.2599>  
544 Berhman, E.L., Kawecki, T.J., & Schmidt, P. (2018). Natural variation in couch potato  
545 mediates rapid evolution of learning and reproduction in natural populations of  
546 *Drosophila melanogaster*. doi: <https://doi.org/10.1101/288696>  
547 Bergland, A. O., Behrman, E. L., O'Brien, K. R., Schmidt, P. S., & Petrov, D. A.  
548 (2014). Genomic evidence of rapid and stable adaptive oscillations over seasonal  
549 time scales in *Drosophila*. *PLoS Genetics*, 10, e1004775.  
550 <https://doi.org/10.1371/journal.pgen.1004775>  
551 Bergland, A. O., Tobler, R., González, J., Schmidt, P., & Petrov, D. (2016).  
552 Secondary contact and local adaptation contribute to genome-wide patterns of  
553 clinal variation in *Drosophila melanogaster*. *Molecular Ecology*, 25, 1157-1174.  
554 <https://doi.org/10.1111/mec.13455>  
555 Blanckenhorn W. U. 2000. The evolution of body size: What keeps organisms small?  
556 *Q. Rev. Biol.* 75, 385–407.  
557 Blanckenhorn, W.U. and M. Demont 2004. Bergmann and converse bergmann  
558 latitudinal clines in arthropods: two ends of a continuum? *Integr Comp Biol.*  
559 44(6):413-24.  
560 Bonnet T, Wandeler P, Camenisch G, Postma E (2017) Bigger Is Fitter? Quantitative  
561 Genetic Decomposition of Selection Reveals an Adaptive Evolutionary Decline of  
562 Body Mass in a Wild Rodent Population. *PLoS Biol* 15(1): e1002592.  
563 <https://doi.org/10.1371/journal.pbio.1002592>  
564 Boyle EA, Yi Li, JK Pritchard. (2017). An expanded view of complex traits: from  
565 polygenic to omnigenic. *Cell* 169 (7), 1177-1186.  
566 Brown JH, Marquet PA, Taper ML. (1993). Evolution of body size: consequences of  
567 an energetic definition of fitness. *Am Nat.*142(4):573-84. doi: 10.1086/285558.  
568 Chakraborty, M., and J. D. Fry. (2016). Evidence that environmental heterogeneity  
569 maintains a detoxifying enzyme polymorphism in *Drosophila melanogaster*. *Current*  
570 *Biology* 26:219-223.

- 571 Cheviron, Z. A., G. C. Bachman, A. D. Connaty, G. B. McClelland, and J. F. Storz.  
572 (2012). Regulatory changes contribute to the adaptive enhancement of  
573 thermogenic capacity in high-altitude deer mice. *Proceedings of the National*  
574 *Academy of Sciences USA*, 109: 8635-8640.
- 575 Chippindale A. K., Chu T. J. F. and Rose M. R. 1996. Complex trade-offs and the  
576 evolution of starvation resistance in *Drosophila melanogaster*. *Evolution* 50, 753–  
577 766.
- 578 Clancy DJ, Gems D, Harshman LG, Oldham S, Stocker H, Hafen E, Leivers SJ,  
579 Partridge L. 2001. Extension of life-span by loss of CHICO, a *Drosophila* insulin  
580 receptor substrate protein. *Science* 2001; 292:41-3.
- 581 Clemente F, Vogl C (2012) Unconstrained evolution in short introns? – An analysis  
582 of genome-wide polymorphism and divergence data from *Drosophila*. *Journal of*  
583 *Evolutionary Biology*, **25**, 1975–1990.
- 584 Cogni R, Kuczynski C, Koury S, Lavington E, Behrman EL, O'Brien KR, Schmidt PS,  
585 Eanes WF. (2014). The intensity of selection acting on the couch potato gene--  
586 spatial-temporal variation in a diapause cline. *Evolution* 68(2):538-48. doi:  
587 10.1111/evo.12291.
- 588 Cogni, R., Kuczynski, K., Koury, S., Lavington, E., Behrman, E. L., O'Brien, K. R., ...  
589 Eanes, W. F. (2017). On the Long-term Stability of Clines in Some Metabolic  
590 Genes in *Drosophila melanogaster*. *Scientific Reports*, 7, 42766.  
591 <http://doi.org/10.1038/srep42766>
- 592 Colombani J, Bianchini L, Layalle S, Pondeville E, Dauphin-Villemant C,  
593 Antoniewski C, Carré C, Noselli S, Léopold P. (2005). Antagonistic actions of  
594 ecdysone and insulins determine final size in *Drosophila*. *Science* 310(5748):667-  
595 70.
- 596 Colosimo PF, Hosemann KE, Balabhadra S, Villarreal G Jr, Dickson M, Grimwood  
597 J, Schmutz J, Myers RM, Schluter D, Kingsley DM. (2005). Widespread parallel  
598 evolution in sticklebacks by repeated fixation of Ectodysplasin alleles. *Science*.  
599 307(5717):1928-33.
- 600 Corbett-Detig RB, Cardeno C, Langley CH (2012) Sequence-based detection and  
601 breakpoint assembly of polymorphic inversions. *Genetics*, **192**, 131–137.
- 602 Comeault AA, Flaxman SM, Riesch R, Curran E, Soria-Carrasco V, Gompert Z,  
603 Farkas TE, Muschick M, Parchman TL, Schwander T, Slate J, Nosil P. (2015).  
604 Selection on a genetic polymorphism counteracts ecological speciation in a stick  
605 insect. *Curr Biol*. 25(15):1975-81. doi: 10.1016/j.cub.2015.05.058.
- 606 Coyne J. A. and Beecham E. 1987. Heritability of two morphological characters  
607 within and among natural populations of *Drosophila melanogaster*. *Genetics* 117:  
608 727–737.
- 609 David J. R. and Capy P. 1988. Genetic variation of *Drosophila melanogaster* natural  
610 populations. *Trends Genet.* 4, 106–111.
- 611 de Jong G. and Bochdanovits Z. 2003 Latitudinal clines in *Drosophila melanogaster*:  
612 body size, allozyme frequencies, inversion frequencies, and the insulin-signalling  
613 pathway. *J. Genet.* 82, 207–223
- 614 Djawdan M., Chippindale A. K., Rose M. R. and Bradley T. J. 1998. Metabolic  
615 reserves and evolved stress resistance in *Drosophila melanogaster*. *Physiol. Zool.*  
616 71, 584–594.
- 617 Durmaz, E., Rajpurohit, S., Betancourt, N., Fabian, D.K., Kapun, M., Schmidt, P., &  
618 Flatt, T. (2018). A clinal polymorphism in the insulin signaling transcription factor  
619 foxo contributes to life history adaptation in *Drosophila*. *Molecular Ecology*, in  
620 review.

- 621 Fabian DK, Kapun M, Nolte V, Kofler R, Schmidt PS, Schlotterer C, and Flatt T.  
622 2012. Genome-wide patterns of latitudinal differentiation among populations of  
623 *Drosophila melanogaster* from North America. *Molecular Ecology* (2012). Blackwell  
624 Publishing Ltd.
- 625 Fabian, D. K., Lack, J. B., Mathur, V., Schlotterer, C., Schmidt, P. S., Pool, J. E., ...  
626 Flatt, T. (2015). Spatially varying selection shapes life history clines among  
627 populations of *Drosophila melanogaster* from sub-Saharan Africa. *Journal of*  
628 *Evolutionary Biology*, 28, 826-840. <https://doi.org/10.1111/jeb.12607>
- 629 Fielenbach, N., & Antebi, A. (2008). *C. elegans* dauer formation and the molecular  
630 basis of plasticity. *Genes & Development*, 22, 2149-2165.  
631 <https://doi.org/10.1101/gad.1701508>
- 632 Garofalo R. S. 2002. Genetic analysis of insulin signaling in *Drosophila*. *Trends*  
633 *Endocrinol. Metab.* 13, 156–162.
- 634 Giannakou ME, Goss M, Juenger MA, Hafen E, Leivers SJ, Partridge L. 2004.  
635 Long-lived *Drosophila* with overexpressed dFOXO in adult fat body. *Science* 2004;  
636 305:361.
- 637 Giannakou ME, Partridge L. 2007. Role of insulin-like signalling in *Drosophila*  
638 lifespan. *Trends in Biochemical Science*, 32, 180–188.
- 639 Gilchrist, A.S., Azevedo, R.B.R., Partridge, L., & O'Higgins, P. (2000). Adaptation  
640 and constraint in the evolution of *Drosophila melanogaster* wing shape. *Evolution &*  
641 *Development*, 2, 114–124. <https://doi.org/10.1046/j.1525-142x.2000.00041.x>
- 642 Harshman L. G., Hoffmann A. A. and Clark A. G. 1999. Selection for starvation  
643 resistance in *Drosophila melanogaster*: physiological correlates, enzyme activities  
644 and multiple stress responses. *J. Evol. Biol.* 12, 370–379.
- 645 Hoffmann A. A., Hallas R., Sinclair C. and Mitrovski P. 2001. Levels of variation in  
646 stress resistance in *Drosophila* among strains, local populations and geographic  
647 regions: Patterns for desiccation, starvation, cold resistance, and associated traits.  
648 *Evolution* 55, 1621–1630.
- 649 Huey, R.B., G.W. Gilchrist, M.L. Carson, D. Berrigan and L. Serra. (2000). Rapid  
650 evolution of a geographic cline in size in an introduced fly. *Science* 287: 308-309.
- 651 Hwangbo, D. S., Gersham, B., Tu, M.-P., Palmer, M., & Tatar, M. (2004). *Drosophila*  
652 dFOXO controls lifespan and regulates insulin signalling in brain and fat body.  
653 *Nature*, 429, 562-566. <https://doi.org/10.1038/nature02549>
- 654 James A. C. and Partridge L. 1995. Thermal evolution of rate of larval development  
655 in *Drosophila melanogaster* in laboratory and field populations. *J. Evol. Biol.* 8,  
656 315–330.
- 657 James A. C., Azevedo R. B. R. and Partridge L. 1995. Cellular basis and  
658 developmental timing in a size cline of *Drosophila melanogaster*. *Genetics* 140,  
659 659–666.
- 660 James A. C., Azevedo R. B. R. and Partridge L. 1997. Genetic and environmental  
661 responses to temperature of *Drosophila melanogaster* from a latitudinal cline.  
662 *Genetics* 146, 881–890.
- 663 Jones MR, Mills LS, Alves PC, Callahan CM, Alves JM, Lafferty DJR, Jiggins FM,  
664 Jensen JD, Melo-Ferreira J, Good JM. (2018). Adaptive introgression underlies  
665 polymorphic seasonal camouflage in snowshoe hares. *Science*. 360(6395):1355-  
666 1358. doi: 10.1126/science.aar5273.
- 667 Kao, J. Y., Zubair, A., Salomon, M. P., Nuzhdin, S. V., & Campo, D. (2015).  
668 Population genomic analysis uncovers African and European admixture in  
669 *Drosophila melanogaster* populations from the south-eastern United States and



- 670 Caribbean Islands. *Molecular Ecology*, 24, 1499-1509.  
671 <https://doi.org/10.1111/mec.13137>
- 672 Kapun M, Fabian DK, Goudet J, Flatt T (2016) Genomic Evidence for Adaptive  
673 Inversion Clines in *Drosophila melanogaster*. *Molecular Biology and Evolution*, **33**,  
674 1317–1336.
- 675 Karan D., Dahiya N., Munjal A. K., Gibert P., Moreteau B., Parkash R. and David J.  
676 R. 1998. Desiccation and starvation tolerance of adult *Drosophila*: Opposite  
677 latitudinal clines in natural populations of three different species. *Evolution* 52,  
678 825–831.
- 679 Kolaczowski, B., Kern, A. D., Holloway, A. K., & Begun, D. J. (2011). Genomic  
680 differentiation between temperate and tropical Australian populations of *Drosophila*  
681 *melanogaster*. *Genetics*, 187, 245–260.  
682 <https://doi.org/10.1534/genetics.110.123059>
- 683 Kramer, J. M., Davidge, J. T., Lockyer, J. M., & Staveley, B. E. (2003). Expression of  
684 *Drosophila* FOXO regulates growth and can phenocopy starvation. *BMC*  
685 *Developmental Biology*, 3, 5. <https://dx.doi.org/10.1186%2F1471-213X-3-5>
- 686 Kramer, J. M., Slade, J. D., & Staveley, B. E. (2008). *foxo* is required for resistance  
687 to amino acid starvation in *Drosophila*. *Genome*, 51, 668-672.  
688 <https://doi.org/10.1139/G08-047>
- 689 Lack JB, Monette MJ, Johanning EJ, Sprengelmeyer QD, Pool JE (2016)  
690 Decanalization of wing development accompanied the evolution of large wings in  
691 high altitude *Drosophila*. *Proc Natl Acad Sci USA* 113:1014-1019.
- 692 Langley CH, Stevens K, Cardeno C *et al.* (2012) Genomic variation in natural  
693 populations of *Drosophila melanogaster*. *Genetics*, **192**, 533–598.
- 694 Laurie, CC and LF Stam. (1988). Quantitative analysis of RNA produced by Slow  
695 and Fast alleles of *Drosophila melanogaster*. *Proc. Natl. Acad. Sci. USA* 85: 5161-  
696 5165.
- 697 Lamichhaney S, Han F, Berglund J, Wang C, Almen MS, Webster MT, et al. (2016).  
698 A beak size locus in Darwin's finches facilitated character displacement during a  
699 drought. *Science*. 352(6284):470±474. doi: [10.1126/science.aad8786](https://doi.org/10.1126/science.aad8786) PMID:  
700 [27102486](https://pubmed.ncbi.nlm.nih.gov/27102486/)
- 701 Lewontin, R. C. (1974). *The Genetic Basis of Evolutionary Change*. New York, USA:  
702 Columbia University Press.
- 703 Libina, N., Berman, J. R., & Kenyon, C. (2003). Tissue-specific activities of *C.*  
704 *elegans* DAF-16 in the regulation of lifespan. *Cell*, 115, 489-502.  
705 [https://doi.org/10.1016/S0092-8674\(03\)00889-4](https://doi.org/10.1016/S0092-8674(03)00889-4)
- 706 Machado, H. E., Bergland, A. O., Taylor, R., Tilk, S., Behrman, E. L., Dyer, K., ...  
707 Petrov, D. (2018). Broad geographic sampling reveals predictable and pervasive  
708 seasonal adaptation in *Drosophila*. *bioRxiv* 337543. <https://doi.org/10.1101/337543>
- 709 Mackay, T. F. C. (2014). Epistasis and Quantitative Traits: Using Model Organisms  
710 to Study Gene-Gene Interactions. *Nature Reviews. Genetics*, 15(1), 22–33.  
711 <http://doi.org/10.1038/nrg3627>
- 712 Mackay TF, Richards S, Stone EA, Barbadilla A, Ayroles JF, Zhu D, Casillas S, Han  
713 Y, Magwire MM, Cridland JM, Richardson MF, Anholt RRH, Barrón M,  
714 Bess C, Blankenburg KP, Carbone MA, Castellano D, Chaboub L, Duncan L,  
715 Harris Z, Javaid M, Jayaseelan JC, Jhangiani SN, Jordan KW, Lara F. 2012. The  
716 *Drosophila melanogaster* Genetic Reference Panel. *Nature* 482, 173–178.
- 717 Mattila, J., Bremer, A., Ahonen, L., Kostianen, R., & Puig, O. (2009). *Drosophila*  
718 FoxO Regulates Organism Size and Stress Resistance through an Adenylate

- 719 Cyclase. *Molecular and Cellular Biology*, 29, 5357-5365.  
720 <https://doi.org/10.1128/MCB.00302-09>
- 721 Manceau M, Domingues VS, Mallarino R, Hoekstra HE. The developmental role of  
722 Agouti in color pattern evolution. *Science* 2011;331:1062-5.
- 723 McKown AD, Klápště J, Guy RD, Geraldes A, Porth I, Hannemann J, Friedmann M,  
724 Muchero W, Tuskan GA, Ehling J, Cronk QC, El-Kassaby YA, Mansfield SD,  
725 Douglas CJ. (2014). Genome-wide association implicates numerous genes  
726 underlying ecological trait variation in natural populations of *Populus trichocarpa*.  
727 *New Phytol.* 203(2):535-53. doi: 10.1111/nph.12815.
- 728 Noach E. J. K., de Jong G. and Scharloo W. 1996. Phenotypic plasticity in  
729 morphological traits in two populations of *Drosophila melanogaster*. *J. Evol. Biol.* 9,  
730 831–844.
- 731 Oakeshott JG, Gibson JB, Anderson PR, Knibb WR, Anderson DG, Chambers GK.  
732 (1982). Alcohol dehydrogenase and glycerol-3-phosphate dehydrogenase clines in  
733 *Drosophila melanogaster* on different continents. *Evolution* 36(1):86-96.  
734 doi:10.1111/j.1558-5646.1982.tb05013.x.
- 735 Oldham S. and Hafen E. 2003. Insulin/IGF and target of rapamycin signaling: a  
736 TOR de force in growth control. *Trends Cell Biol.* 13, 79–85.
- 737 Paaby AB, Schmidt PS. 2008. Functional significance of allelic variation at  
738 methuselah, an aging gene in *Drosophila*. *PLoS ONE*, 3, e1987.
- 739 Paaby, A. B., & Schmidt, P. S. (2009). Dissecting the genetics of longevity in  
740 *Drosophila melanogaster*. *Fly*, 3, 1-10. <https://doi.org/10.4161/fly.3.1.7771>
- 741 Paaby, A. B., Bergland, A. O., Behrman, E. L., & Schmidt, P. S. (2014). A highly  
742 pleiotropic amino acid polymorphism in the *Drosophila* insulin receptor contributes  
743 to life-history adaptation. *Evolution*, 68, 3395–3409.  
744 <https://doi.org/10.1111/evo.12546>
- 745 Paaby, A. B., Blacket, M. J., Hoffmann, A. A., & Schmidt, P. S. (2010). Identification  
746 of a candidate adaptive polymorphism for *Drosophila* life history by parallel  
747 independent clines on two continents. *Molecular Ecology*, 19, 760-774.  
748 <https://doi.org/10.1111/j.1365-294X.2009.04508.x>
- 749 Partridge L, Coyne JA. (1997). Bergmann's rule in ectotherms: is it adaptive?  
750 *Evolution.* 51:632–635.
- 751 Parsch J, Novozhilov S, Saminadin-Peter SS, Wong KM, Andolfatto P (2010) On the  
752 utility of short intron sequences as a reference for the detection of positive and  
753 negative selection in *Drosophila*. *Molecular Biology and Evolution*, 27, 1226–1234.
- 754 R Development Core Team (2009) R: A Language and Environment for Statistical  
755 Computing. *R-project.org*.
- 756 Rajpurohit, S., Hanus, R., Vrkoslav, V., Behrman, E. L., Bergland, A. O., Petrov, D.,  
757 ... Schmidt, P. S. (2017). Adaptive dynamics of cuticular hydrocarbons  
758 in *Drosophila*. *Journal of Evolutionary Biology*, 30(1), 66–80.  
759 <http://doi.org/10.1111/jeb.12988>
- 760 Rajpurohit S, Gefen E, Bergland AO, Petrov DA, Gibbs AG, Schmidt PS. (2018).  
761 Spatiotemporal dynamics and genome-wide association analysis of desiccation  
762 tolerance in *Drosophila melanogaster*. *Mol Ecol.* 27(17):3525-3540. doi:  
763 10.1111/mec.14814.
- 764 Reinhardt, J. A., Kolaczkowski, B., Jones, C. D., Begun, D. J., & Kern, A. D. (2014).  
765 Parallel Geographic Variation in *Drosophila melanogaster*. *Genetics*, 197, 361-373.  
766 <https://doi.org/10.1534/genetics.114.161463>
- 767 Robinson S. J. W., Zwaan B. and Partridge L. 2000. Starvation resistance and adult  
768 body composition in a latitudinal cline of *Drosophila melanogaster*. *Evolution* 54,

- 769 1819–1824.
- 770 Robinson S. J. W. and Partridge L. 2001. Temperature and cli- nal variation in larval  
771 growth efficiency in *Drosophila melanogaster*. *J. Evol. Biol.* 14, 14–21.
- 772 Rockman, M. V. (2012). The QTN program and the alleles that matter for evolution:  
773 all that's gold does not glitter. *Evolution*, 66, 1-17. [https://doi.org/10.1111/j.1558-](https://doi.org/10.1111/j.1558-5646.2011.01486.x)  
774 [5646.2011.01486.x](https://doi.org/10.1111/j.1558-5646.2011.01486.x)
- 775 Roff DA (2007). A centennial celebration for quantitative genetics. *Evolution*.  
776 61(5):1017±1032. doi: [10.1111/j.1558-5646.2007.00100.x](https://doi.org/10.1111/j.1558-5646.2007.00100.x) PMID: 17492957
- 777 Saucedo L. J. and Edgar B. A. 2002. Why size matters: altering cell size. *Curr. Opin.*  
778 *Genet. Dev.* 12, 565–571.
- 779 Savolainen O, Lascoux M, Merilä J. (2013). Ecological genomics of local adaptation.  
780 *Nat Rev Genet.* 14(11):807-20. doi: 10.1038/nrg3522.
- 781 Schmidt, P. S., & Conde, D. R. (2006). Environmental Heterogeneity and the  
782 Maintenance of Genetic Variation for Reproductive Diapause in *Drosophila*  
783 *melanogaster*. *Evolution*, 60, 1602. [https://doi.org/10.1111/j.0014-](https://doi.org/10.1111/j.0014-3820.2006.tb00505.x)  
784 [3820.2006.tb00505.x](https://doi.org/10.1111/j.0014-3820.2006.tb00505.x)
- 785 Schmidt, P. S., & Paaby, A. B. (2008). Reproductive Diapause and Life-History  
786 Clines in North American Populations of *Drosophila melanogaster*. *Evolution*, 62,  
787 1204-1215. <https://doi.org/10.1111/j.1558-5646.2008.00351.x>
- 788 Schmidt, P. S., Duvernell, D. D., & Eanes, W. F. (2000). Adaptive evolution of a  
789 candidate gene for aging in *Drosophila*. *Proceedings of the National Academy of*  
790 *Sciences*, 97, 10861–10865. <https://dx.doi.org/10.1073/pnas.190338897>
- 791 Schmidt, P. S., Matzkin, L., Ippolito, M., & Eanes, W. F. (2005). Geographic Variation  
792 in Diapause Incidence, Life-History Traits, and Climatic Adaptation in *Drosophila*  
793 *melanogaster*. *Evolution*, 59, 1721-1732. [https://doi.org/10.1111/j.0014-](https://doi.org/10.1111/j.0014-3820.2005.tb01821.x)  
794 [3820.2005.tb01821.x](https://doi.org/10.1111/j.0014-3820.2005.tb01821.x)
- 795 Schmidt, P. S., Paaby, A. B., & Heschel, M. S. (2005). Genetic variance for diapause  
796 expression and associated life histories in *Drosophila melanogaster*. *Evolution*, 59,  
797 2616-2625. <https://doi.org/10.1111/j.0014-3820.2005.tb00974.x>
- 798 Schmidt, P. S., Zhu, C-T., Das, J., Batavia, M., Yang, L., & Eanes, W. F. (2008). An  
799 amino acid polymorphism in the *couch potato* gene forms the basis for climatic  
800 adaptation in *Drosophila melanogaster*. *Proceedings of the National Academy of*  
801 *Sciences USA*, 105, 16207-16211. <https://doi.org/10.1073/pnas.0805485105>
- 802 Sezgin, E., Duvernell, D. D., Matzkin, L. M., Duan, Y., Zhu, C.-T., Verrelli, B. C., &  
803 Eanes, W. F. (2004). Single-Locus Latitudinal Clines and Their Relationship to  
804 Temperate Adaptation in Metabolic Genes and Derived Alleles in *Drosophila*  
805 *melanogaster*. *Genetics*, 168(2), 923–931.  
806 <http://doi.org/10.1534/genetics.104.027649>
- 807 Sim C, Kang DS, Kim S, Bai X, and Denlinger D. 2015. Identification of FOXO  
808 targets that generate diverse features of the diapause phenotype in the mosquito  
809 *Culex pipiens*. *PNAS*. March 24, 2015 | vol. 112 | no. 12 | 3811–3816
- 810 Staubach, F., Baines, J. F., Künzel, S., Bik, E. M., & Petrov, D. A. (2013). Host  
811 Species and Environmental Effects on Bacterial Communities Associated  
812 with *Drosophila* in the Laboratory and in the Natural Environment. *PLoS ONE*, 8(8),  
813 e70749. <http://doi.org/10.1371/journal.pone.0070749>
- 814 Stern, D. L., (2011). *Evolution, development, & the predictable genome*. Roberts &  
815 Co. Publishers. <https://doi.org/10.1086/663915>
- 816 Stillwell, R.C. (2010). *Oikos*. 119(9): 1387–1390. doi: 10.1111/j.1600-  
817 0706.2010.18670.x

818 Stillwell RC, Morse GE, Fox CW. (2007). Geographic variation in body size and  
819 sexual size dimorphism of a seed-feeding beetle. *Am Nat.* 170(3):358-69.  
820 Sutter, N. B., Bustamante, C. D., Chase, K., Gray, M. M., Zhao, K., Zhu, L., ...  
821 Ostrander, E. A. (2007). A Single *IGF1* Allele Is a Major Determinant of Small Size  
822 in Dogs. *Science (New York, N.Y.)*, 316(5821), 112–115.  
823 <http://doi.org/10.1126/science.1137045>  
824 Svetec, N., Cridland, J. M., Zhao, L., & Begun, D. J. (2016). The Adaptive  
825 Significance of Natural Genetic Variation in the DNA Damage Response  
826 of *Drosophila melanogaster*. *PLoS Genetics*, 12(3), e1005869.  
827 <http://doi.org/10.1371/journal.pgen.1005869>  
828 Tatar M, Kopelman A, Epstein D, Tu M-P, Yin C-M, Garofalo RS. 2001. A mutant  
829 *Drosophila* insulin receptor homolog that extends life-span and impairs  
830 neuroendocrine function. *Science* 2001; 292:107-10  
831 Tatar M, Yin C. (2011). Slow aging during insect reproductive diapause: Why butter-  
832 flies, grasshoppers and flies are like worms. *Exp Gerontol* 36(4-6):723–738.  
833 Umina, PA, AR Weeks, MR Kearney, SW McKechnie and AA Hoffmann. (2005). A  
834 rapid shift in a classic clinal pattern in *Drosophila* reflecting climate change.  
835 *Science* 308(5722): 691-693.  
836 van't Hof, A.E., Campagne, P., Rigden, D.J., Yung, C.J., Lingley, J., Quail, M.A.,  
837 Hall, N., Darby, A.C., and Saccheri, I.J. (2016). The industrial melanism mutation in  
838 British peppered moths is a transposable element. *Nature* 534, 102–105.  
839 Walters, AW, Matthews, MK, Hughes, RC, Malcolm, J, Rudman, SR, Newell, PD,  
840 Douglas, A, Schmidt, P, & Chaston, JM. 2018. The microbiota influences the  
841 *Drosophila melanogaster* life history strategy. *PLoS Biology*, in review.  
842 Weir BS, Cockerham CC (1984) Estimating *F*-Statistics for the Analysis of  
843 Population Structure. *Evolution*, 38, 1358–1370.  
844 Wellenreuther M, Hansson B. (2016). Detecting Polygenic Evolution: Problems,  
845 Pitfalls, and Promises. *Trends Genet.* 32(3):1±10. doi: [10.1016/j.tig.2015.12.004](https://doi.org/10.1016/j.tig.2015.12.004)  
846 Yang, Y. and I. Edery. (2018). Parallel clinal variation in the mid-day siesta of  
847 *Drosophila melanogaster* implicates continent-specific targets of natural selection.  
848 *PloS Genetics*. <https://doi.org/10.1371/journal.pgen.1007612>  
849 Zwaan B. J., Azevedo R. B. R., James A. C., van't Land J. and Partridge L. 2000.  
850 Cellular basis of wing size variation in *Drosophila melanogaster*: a comparison of  
851 latitudinal clines on two continents. *Heredity* 84, 338–347.  
852  
853  
854  
855  
856  
857  
858

Table 1. Analyses of variance for the assayed phenotypic traits among natural populations.

|            |    | Starvation Tolerance |         |     |       |       |        |     |
|------------|----|----------------------|---------|-----|-------|-------|--------|-----|
|            |    | Females              |         |     | Males |       |        |     |
|            | DF | DFDen                | F       | p   | DF    | DFDen | F      | p   |
| Population | 5  | 116.6                | 11.0359 | *** | 5     | 114.1 | 5.6347 | *** |

  

|            |    | Development Time |         |     |       |       |         |     |
|------------|----|------------------|---------|-----|-------|-------|---------|-----|
|            |    | Females          |         |     | Males |       |         |     |
|            | DF | DFDen            | F       | p   | DF    | DFDen | F       | p   |
| Population | 5  | 133.3            | 6.7468  | *** | 5     | 132.1 | 6.4188  | *** |
| Block      | 2  | 649.8            | 69.6903 | *** | 2     | 539.6 | 75.5155 | *** |

  

|            |    | Wing Area |       |     |       |       |        |     |
|------------|----|-----------|-------|-----|-------|-------|--------|-----|
|            |    | Females   |       |     | Males |       |        |     |
|            | DF | DFDen     | F     | p   | DF    | DFDen | F      | p   |
| Population | 5  | 136.8     | 14.15 | *** | 5     | 136.4 | 11.537 | *** |
| Block      | 2  | 386.6     | 2.719 |     | 2     | 394.9 | 4.707  | **  |

  

|            |    | Thorax Length |        |     |       |       |        |    |
|------------|----|---------------|--------|-----|-------|-------|--------|----|
|            |    | Females       |        |     | Males |       |        |    |
|            | DF | DFDen         | F      | p   | DF    | DFDen | F      | p  |
| Population | 5  | 135.4         | 4.712  | *** | 5     | 140.9 | 3.2804 | ** |
| Block      | 2  | 363.6         | 0.0459 |     | 2     | 365.8 | 1.9564 |    |

  

|            |    | Wing Area / Thorax Length |        |     |       |       |       |     |
|------------|----|---------------------------|--------|-----|-------|-------|-------|-----|
|            |    | Females                   |        |     | Males |       |       |     |
|            | DF | DFDen                     | F      | p   | DF    | DFDen | F     | p   |
| Population | 5  | 135.6                     | 13.914 | *** | 5     | 137.7 | 11.45 | *** |
| Block      | 2  | 365.3                     | 3.687  | *   | 2     | 372.1 | 3.272 | *   |

  

\*  $p < 0.05$   
 \*\*  $p < 0.01$   
 \*\*\*  $p < 0.0001$

859

Table 2. Analyses of variation for the effects of the high and low latitude *foxo* alleles on phenotype.

| Starvation                |    |           |         |          |                    |    |           |        |          |
|---------------------------|----|-----------|---------|----------|--------------------|----|-----------|--------|----------|
| Females                   |    |           |         |          | Males              |    |           |        |          |
|                           | DF | SS        | F       | <i>p</i> | Source             | DF | SS        | F      | <i>p</i> |
| Allele                    | 1  | 1128.838  | 8.381   | **       | Allele             | 1  | 1039.233  | 8.142  | **       |
| Set [Allele]              | 2  | 2535.857  | 9.414   | ***      | Set [Allele]       | 2  | 1988.758  | 7.791  | ***      |
| Cage [Allele, Set]        | 4  | 2492.854  | 4.627   | **       | Cage [Allele, Set] | 4  | 1202.370  | 2.355  |          |
| Development Time          |    |           |         |          |                    |    |           |        |          |
| Females                   |    |           |         |          | Males              |    |           |        |          |
|                           | DF | SS        | F       | <i>p</i> | Source             | DF | SS        | F      | <i>p</i> |
| Allele                    | 1  | 57.118    | 0.670   |          | Allele             | 1  | 111.796   | 3.233  |          |
| Set [Allele]              | 2  | 416.404   | 2.443   |          | Set [Allele]       | 2  | 307.582   | 4.447  | *        |
| Cage [Allele, Set]        | 4  | 2400.365  | 7.041   | ***      | Cage [Allele, Set] | 4  | 413.108   | 2.987  | *        |
| Wing Area                 |    |           |         |          |                    |    |           |        |          |
| Females                   |    |           |         |          | Males              |    |           |        |          |
|                           | DF | SS        | F       | <i>p</i> | Source             | DF | SS        | F      | <i>p</i> |
| Allele                    | 1  | 1.95E+11  | 57.7364 | ***      | Allele             | 1  | 8.69E+10  | 41.351 | ***      |
| Set [Allele]              | 2  | 1.12E+11  | 16.4958 | ***      | Set [Allele]       | 2  | 4.30E+10  | 10.229 | ***      |
| Cage [Allele, Set]        | 4  | 2.46E+11  | 18.1487 | ***      | Cage [Allele, Set] | 4  | 1.01E+11  | 11.997 | ***      |
| Thorax Length             |    |           |         |          |                    |    |           |        |          |
| Females                   |    |           |         |          | Males              |    |           |        |          |
|                           | DF | SS        | F       | <i>p</i> | Source             | DF | SS        | F      | <i>p</i> |
| Allele                    | 1  | 8185.111  | 8.167   | **       | Allele             | 1  | 5689.745  | 9.974  | **       |
| Set [Allele]              | 2  | 11580.028 | 5.777   | **       | Set [Allele]       | 2  | 5644.897  | 4.948  | **       |
| Cage [Allele, Set]        | 4  | 14914.627 | 3.721   | **       | Cage [Allele, Set] | 4  | 9119.648  | 3.997  | **       |
| Wing Area / Thorax Length |    |           |         |          |                    |    |           |        |          |
| Females                   |    |           |         |          | Males              |    |           |        |          |
|                           | DF | SS        | F       | <i>p</i> | Source             | DF | SS        | F      | <i>p</i> |
| Allele                    | 1  | 97159.11  | 39.827  | ***      | Allele             | 1  | 52392.037 | 34.190 | ***      |
| Set [Allele]              | 2  | 38974.63  | 7.988   | ***      | Set [Allele]       | 2  | 19500.916 | 6.363  | **       |
| Cage [Allele, Set]        | 4  | 152264.86 | 15.604  | ***      | Cage [Allele, Set] | 4  | 85498.41  | 13.949 | ***      |

860 \*  $p < 0.05$  \*\*  $p < 0.01$  \*\*\*  $p < 0.0001$

861

862

863

864

865

## 866 **Figure legends**

867 **Figure 1.** Allele frequency changes for *foxo*-associated SNPs in 10 populations  
868 sampled along the North American east coast. Both plots show allele frequency  
869 differences conditioned to increase from south to north, with frequencies in Florida  
870 being set to zero. Panel A shows allele frequency changes for all SNPs according to  
871 their genomic position. Here, the *foxo* candidate SNPs are highlighted by two vertical  
872 black lines (solid: 3R: 9,892,517; dashed: 3R: 9,894,449; *Drosophila melanogaster*  
873 reference genome v6). Panel B shows how allele frequencies change with latitude.  
874 The two *foxo* candidate SNPs are highlighted in red (solid: 3R: 9,892,517; dashed:  
875 3R: 9,894,449).

876

877 **Figure 2.** Empirical cumulative density functions (ECDF; total area = 1) calculated  
878 from the distribution of  $-\log_{10}(p\text{-values})$  for generalized linear models that test for  
879 associations between allele frequencies and latitude in 20,000 neutrally evolving  
880 SNPs (Panels A, B) and 1,372 non-candidate SNPs located inside or within 2 kbp  
881 distance to *foxo*. The vertical dashed lines indicate the significance values of the two  
882 candidate SNPs 3R: 9,892,517 (Panels A, C) and 3R: 9,894,449 (Panels B, D). The  
883 grey areas limited by the dashed line indicate the percentiles of neutral or non-  
884 candidate *foxo* SNPs with significance values larger than the candidates.

885

886 **Figure 3.**  $F_{ST}$  Manhattan plots for the biological replicates A and B, constructed from  
887 independent sets of inbred lines from the DGRP panel. All SNPs associated with  
888 *foxo* are highlighted in red. These analyses show that only the two focal SNPs are  
889 fixed for alternative alleles in the low- and high-latitude population cages of sets A  
890 and B.

891

892 **Figure 4.** Phenotypic analysis of natural populations collected across the latitudinal  
893 gradient in the eastern U.S. (A-D) and the homozygous high- and low-latitude *foxo*  
894 genotypes (E-H). In all panels, females are depicted by filled symbols and males by  
895 open symbols. Starvation tolerance increases with increasing latitude (A); similarly,  
896 the high-latitude *foxo* allele is associated with increased starvation resistance (E).  
897 Development time does not vary predictably with latitude (B), and is also equivalent  
898 between *foxo* alleles (F). Wing area (C) and the ratio of wing area to thorax length  
899 (D) exhibit a positive latitudinal cline in the sampled populations; these patterns of  
900 size variation in the natural populations are mirrored in both magnitude and direction  
901 by the observed differences in size parameters between the low and high-latitude  
902 *foxo* alleles (G, H).

903

904



905  
906 Figure 1.

907

908

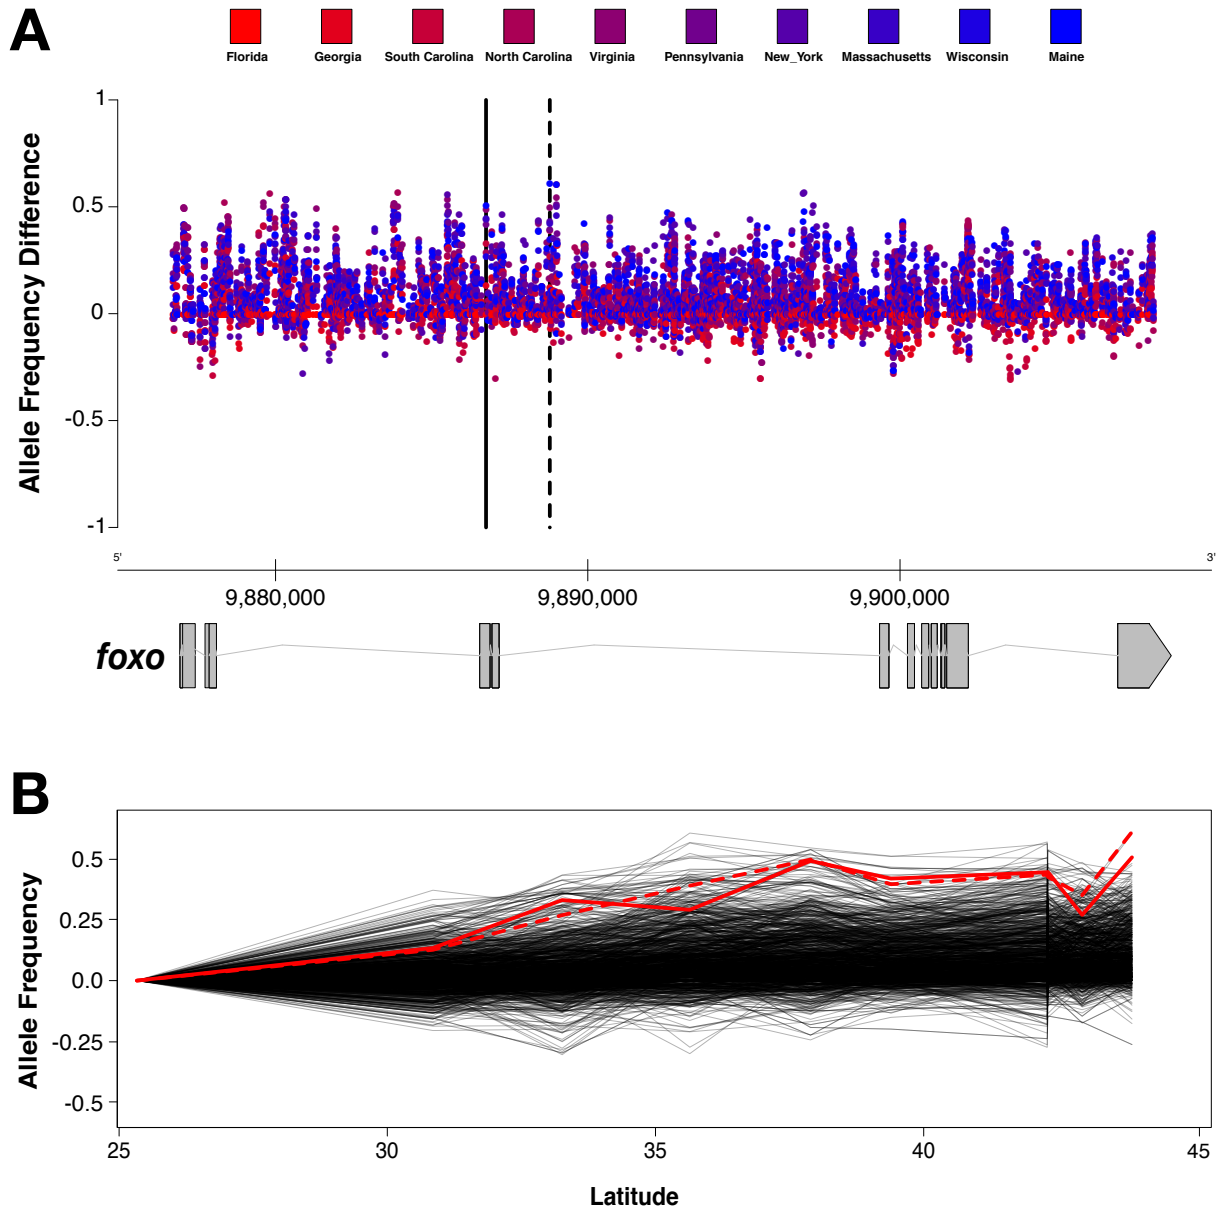

909

910

911

912

913  
914  
915  
916  
917

Figure 2.

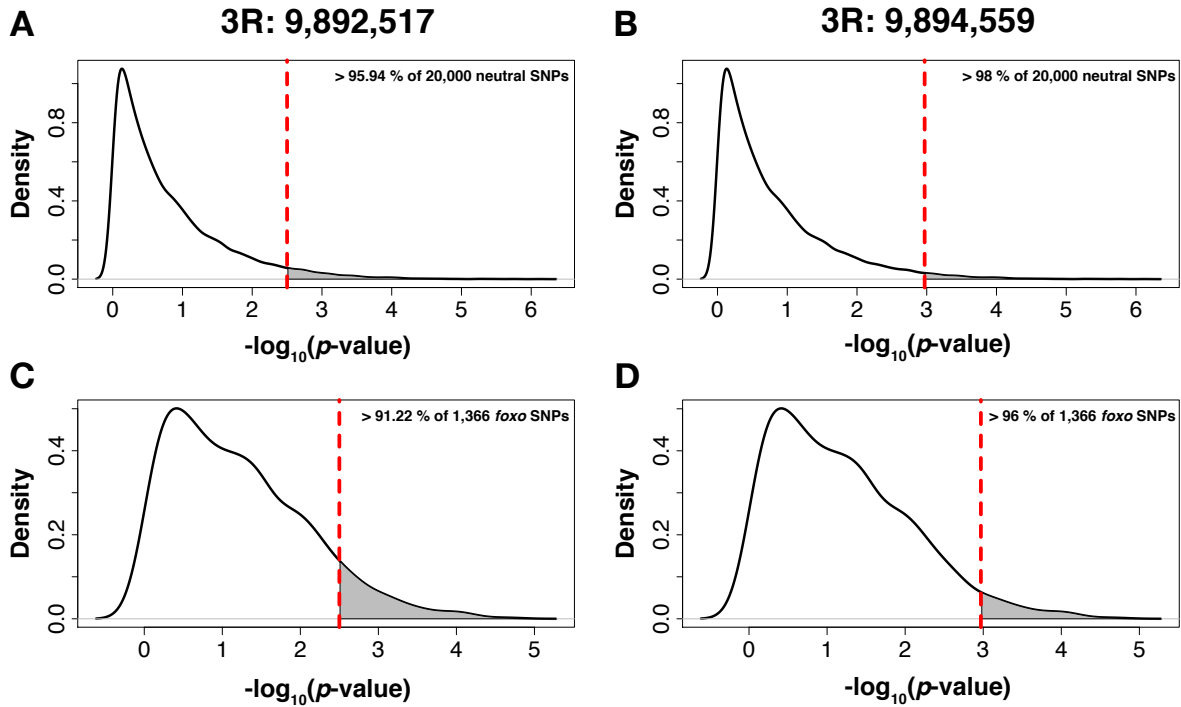

918  
919  
920  
921  
922  
923  
924  
925  
926  
927  
928  
929  
930  
931  
932  
933  
934  
935  
936  
937  
938  
939  
940  
941  
942  
943

944  
945  
946  
947

Figure 3.

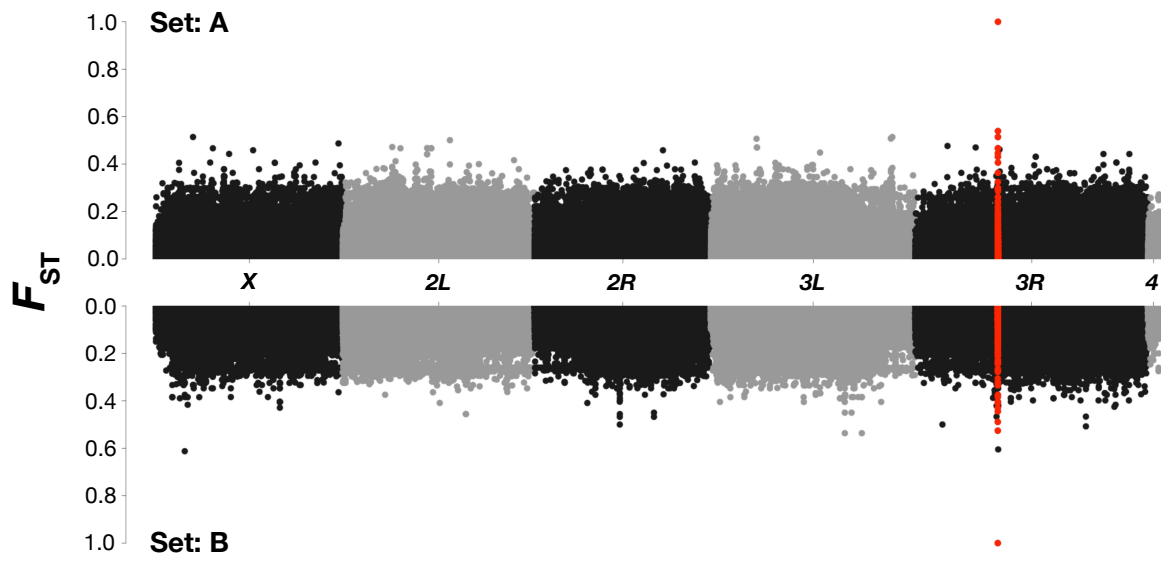

948  
949  
950  
951  
952

953  
954  
955  
956  
957  
958  
959  
960  
961  
962  
963

Figure 4.

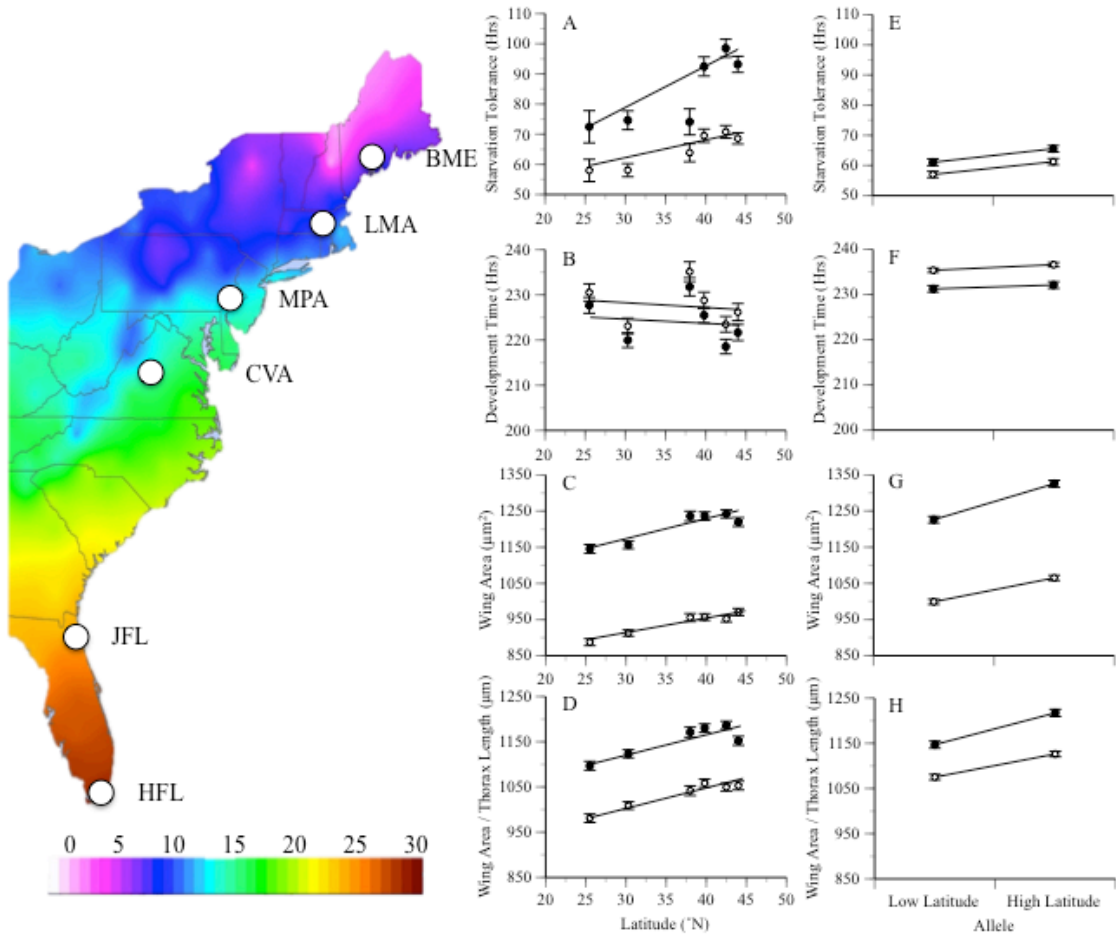

964  
965
